# Supplementary material
Source: PubMed Central journal article supplement (PMC4136237)
Supplement: IAI.01778-14_zii999090771so1.pdf [file IAI.01778-14_zii999090771so1.pdf]

**Supplemental Table 1. Differential Gene Expression by RT-PCR array**

| Gene ID | Differential Expression <sup>1</sup><br>(PND / WN) | Gene ID | Differential Expression <sup>1</sup><br>(PND / WN) | Gene ID | Differential Expression <sup>1</sup><br>(PND / WN) | Gene ID | Differential Expression <sup>1</sup><br>(PND / WN) |
|---------|----------------------------------------------------|---------|----------------------------------------------------|---------|----------------------------------------------------|---------|----------------------------------------------------|
| Adamts1 | -1.6771                                            | Itgb3   | -1.1535                                            | Abcf1   | 1.32                                               | Cxcr3   | -1.03                                              |
| Adamts2 | -1.1535                                            | Itgb4   | -1.0762                                            | Bcl6    | -1.1                                               | Ccr10   | 4.19                                               |
| Adamts5 | -1.0253                                            | Lama1   | -2.2284                                            | Cxcr5   | 1.6                                                | Ifng    | -2.32                                              |
| Adamts8 | 1.2605                                             | Lama2   | -1.0042                                            | C3      | 1.2                                                | Il10    | 1.43                                               |
| Ctnna1  | 1.105                                              | Lama3   | -1.1859                                            | Casp1   | -1.15                                              | Il10ra  | 1.65                                               |
| Ctnna2  | -1.0396                                            | Lamb2   | 4.1814                                             | Ccl1    | 1.79                                               | Il10rb  | 1.13                                               |
| Ctnnb1  | -1.1535                                            | Lamb3   | -1.2799                                            | Ccl11   | -3.68                                              | Il11    | 1.79                                               |
| Cd44    | -1.3813                                            | Lamc1   | 1.2959                                             | Ccl12   | -1.58                                              | Il13    | -3.6                                               |
| Cdh1    | -1.554                                             | Mmp10   | 1.0028                                             | Ccl17   | 1.16                                               | Il13ra1 | -1.01                                              |
| Cdh2    | 1.9917                                             | Mmp11   | -1.0396                                            | Ccl19   | 2.07                                               | Il15    | -1.96                                              |
| Cdh3    | -1.0396                                            | Mmp12   | -1.0396                                            | Ccl2    | -5.77                                              | Il16    | -1.25                                              |
| Cdh4    | -1.1859                                            | Mmp13   | -1.654                                             | Ccl20   | -1.21                                              | Il17b   | -5.35                                              |
| Cntn1   | 1.0747                                             | Mmp14   | -1.2449                                            | Ccl22   | -1.2                                               | Il18    | -1.31                                              |
| Col1a1  | -1.271                                             | Mmp15   | 1.226                                              | Ccl24   | 1.7                                                | Il1a    | 1.29                                               |
| Col2a1  | -1.0396                                            | Mmp1a   | -1.0396                                            | Ccl25   | 1.57                                               | Il1b    | -1.32                                              |
| Col3a1  | -2.7245                                            | Mmp2    | 1.1599                                             | Ccl3    | -1.43                                              | Il1f6   | 1.6                                                |
| Col4a1  | -1.1777                                            | Mmp3    | -1.9132                                            | Ccl4    | -1.25                                              | Il1f8   | 1.54                                               |
| Col4a2  | -1.3528                                            | Mmp7    | -2.2284                                            | Ccl5    | -1.42                                              | Il1r1   | -1.32                                              |
| Col4a3  | -1.0396                                            | Mmp8    | -1.6313                                            | Ccl6    | 1.04                                               | Il1r2   | 2.12                                               |
| Col5a1  | -1.6313                                            | Mmp9    | -2.0083                                            | Ccl7    | -3.04                                              | Il20    | 1.79                                               |
| Col6a1  | -1.0688                                            | Ncam1   | -1.7484                                            | Ccl8    | -2.19                                              | Il2rb   | -1.07                                              |
| Vcan    | -2.4049                                            | Ncam2   | -1.0396                                            | Ccl9    | 1.39                                               | Il2rg   | 1.6                                                |
| Ctgf    | -1.4499                                            | Pecam1  | -1.3159                                            | Ccr1    | -1.05                                              | Il3     | 1.79                                               |
| Ecm1    | 1.105                                              | Postn   | -1.8609                                            | Ccr2    | -2.51                                              | Il4     | -1.94                                              |

|         |         |        |         |        |       |          |       |
|---------|---------|--------|---------|--------|-------|----------|-------|
| Emilin1 | 1.3324  | Sele   | -1.0112 | Ccr3   | -1.76 | Il5ra    | -1.24 |
| Entpd1  | -1.2363 | Sell   | -1.2193 | Ccr4   | 1.54  | Il6ra    | -1.09 |
| Fbln1   | 1.0973  | Selp   | -1.2535 | Ccr5   | -1.46 | Il6st    | 2.12  |
| Fn1     | 1.031   | Sgce   | 1.031   | Ccr6   | -1.15 | Il8rb    | 1.53  |
| Hapln1  | -1.0396 | Sparc  | -1.2193 | Ccr7   | 1.83  | Itgam    | -1.51 |
| Hc      | -1.0112 | Spock1 | -1.0396 | Ccr8   | 1.8   | Itgb2    | 1.03  |
| Icam1   | -1.1376 | Spp1   | -2.1082 | Ccr9   | -2.96 | Lta      | 1.48  |
| Itga2   | 1.1204  | Syt1   | 2.1947  | Crp    | 1.91  | Ltb      | -1.08 |
| Itga3   | 2.1644  | Tgfbi  | 1.351   | Cx3cl1 | 1.41  | Mif      | 1.25  |
| Itga4   | -1.9534 | Thbs1  | -1.62   | Cxcl1  | -3.88 | Scye1    | 1.05  |
| Itga5   | 1.0973  | Thbs2  | 1.4682  | Cxcl10 | -5.58 | Spp1     | -2.56 |
| Itgae   | 1.2346  | Thbs3  | 1.5199  | Cxcl11 | -2.04 | Tgfb1    | 1.63  |
| Itgal   | 1.0973  | Timp1  | -1.0396 | Cxcl12 | -1.39 | Tnf      | 1.39  |
| Itgam   | -1.2193 | Timp2  | 1.1519  | Cxcl13 | -1.03 | Tnfrsf1a | -1.48 |
| Itgav   | -1.0182 | Timp3  | -1.4804 | Cxcl15 | 1.79  | Tnfrsf1b | -1.99 |
| Itgax   | 1.2518  | Tnc    | -1.0324 | Pf4    | 1.67  | Cd40lg   | 1.3   |
| Itgb1   | -1.0913 | Vcam1  | 1.06    | Cxcl5  | -1.55 | Tollip   | 1.28  |
| Itgb2   | 1.2518  | Vtn    | -1.522  | Cxcl9  | -1.21 | Xcr1     | 1     |

<sup>1</sup> Differential gene expression was determined by calculating the ratio of expression of the individual gene in the lymph nodes pooled from malnourished (polynutrient deficient, PND) mice relative to well-nourished (WN) mice (n=4 per group). A negative number indicates reduced expression in the malnourished mice relative to the well-nourished mice.
